# Supplementary material for: Pick-up, transport and release of a molecular cargo using a small-molecule robotic arm
Source: Springer Nature journal article supplement (doi:10.1038/nchem.2410), 2015-12-21
Supplement: 41557_2016_BFnchem2410_MOESM9_ESM.mol [file 41557_2016_BFnchem2410_MOESM9_ESM.mol]

  ChemDraw11251505162D

 82 90  0  0  0  0  0  0  0  0999 V2000
   -3.5325    2.1581    0.0000 C   0  0  0  0  0  0  0  0  0  0  0  0
   -2.8251    1.7337    0.0000 C   0  0  0  0  0  0  0  0  0  0  0  0
   -3.5187    2.9830    0.0000 O   0  0  0  0  0  0  0  0  0  0  0  0
   -4.2538    1.7577    0.0000 O   0  0  0  0  0  0  0  0  0  0  0  0
   -2.1038    2.1341    0.0000 C   0  0  0  0  0  0  0  0  0  0  0  0
   -2.0899    2.9590    0.0000 C   0  0  0  0  0  0  0  0  0  0  0  0
   -1.3686    3.3595    0.0000 C   0  0  0  0  0  0  0  0  0  0  0  0
   -0.6612    2.9351    0.0000 C   0  0  0  0  0  0  0  0  0  0  0  0
   -0.6750    2.1102    0.0000 C   0  0  0  0  0  0  0  0  0  0  0  0
   -1.3963    1.7097    0.0000 N   0  0  0  0  0  0  0  0  0  0  0  0
    0.0601    3.3355    0.0000 C   0  0  0  0  0  0  0  0  0  0  0  0
    0.7676    2.9111    0.0000 C   0  0  0  0  0  0  0  0  0  0  0  0
    1.4889    3.3115    0.0000 C   0  0  0  0  0  0  0  0  0  0  0  0
    1.5027    4.1364    0.0000 C   0  0  0  0  0  0  0  0  0  0  0  0
    0.7952    4.5608    0.0000 C   0  0  0  0  0  0  0  0  0  0  0  0
    0.0740    4.1604    0.0000 C   0  0  0  0  0  0  0  0  0  0  0  0
    2.1963    2.8871    0.0000 O   0  0  0  0  0  0  0  0  0  0  0  0
    2.9176    3.2875    0.0000 C   0  0  0  0  0  0  0  0  0  0  0  0
    3.6250    2.8631    0.0000 C   0  0  0  0  0  0  0  0  0  0  0  0
    4.3463    3.2636    0.0000 C   0  0  0  0  0  0  0  0  0  0  0  0
   -2.8389    0.9088    0.0000 N   0  0  0  0  0  0  0  0  0  0  0  0
   -2.1315    0.4844    0.0000 N   0  0  0  0  0  0  0  0  0  0  0  0
   -0.7166   -0.3645    0.0000 N   0  0  0  0  0  0  0  0  0  0  0  0
   -0.0091   -0.7889    0.0000 C   0  0  0  0  0  0  0  0  0  0  0  0
   -0.0230   -1.6138    0.0000 C   0  0  0  0  0  0  0  0  0  0  0  0
   -0.7442   -2.0143    0.0000 C   0  0  0  0  0  0  0  0  0  0  0  0
   -1.4517   -1.5898    0.0000 C   0  0  0  0  0  0  0  0  0  0  0  0
   -2.1730   -1.9903    0.0000 C   0  0  0  0  0  0  0  0  0  0  0  0
   -2.8804   -1.5658    0.0000 C   0  0  0  0  0  0  0  0  0  0  0  0
   -2.8666   -0.7410    0.0000 C   0  0  0  0  0  0  0  0  0  0  0  0
   -2.1453   -0.3405    0.0000 C   0  0  0  0  0  0  0  0  0  0  0  0
   -1.4379   -0.7649    0.0000 C   0  0  0  0  0  0  0  0  0  0  0  0
   -5.0443   -2.7672    0.0000 C   0  0  0  0  0  0  0  0  0  0  0  0
   -4.3369   -3.1916    0.0000 C   0  0  0  0  0  0  0  0  0  0  0  0
   -3.6156   -2.7912    0.0000 C   0  0  0  0  0  0  0  0  0  0  0  0
   -3.6017   -1.9663    0.0000 C   0  0  0  0  0  0  0  0  0  0  0  0
   -4.3092   -1.5419    0.0000 C   0  0  0  0  0  0  0  0  0  0  0  0
   -5.0305   -1.9423    0.0000 C   0  0  0  0  0  0  0  0  0  0  0  0
   -5.7656   -3.1677    0.0000 C   0  0  0  0  0  0  0  0  0  0  0  0
   -6.4731   -2.7432    0.0000 C   0  0  0  0  0  0  0  0  0  0  0  0
   -7.1943   -3.1437    0.0000 C   0  0  0  0  0  0  0  0  0  0  0  0
   -7.2082   -3.9686    0.0000 C   0  0  0  0  0  0  0  0  0  0  0  0
   -6.5007   -4.3930    0.0000 C   0  0  0  0  0  0  0  0  0  0  0  0
   -5.7794   -3.9925    0.0000 C   0  0  0  0  0  0  0  0  0  0  0  0
   -2.9081   -3.2156    0.0000 C   0  0  0  0  0  0  0  0  0  0  0  0
   -7.9018   -2.7192    0.0000 C   0  0  0  0  0  0  0  0  0  0  0  0
   -7.8880   -1.8944    0.0000 O   0  0  0  0  0  0  0  0  0  0  0  0
   -8.6231   -3.1197    0.0000 D   0  0  0  0  0  0  0  0  0  0  0  0
    2.0994   -2.8871    0.0000 C   0  0  0  0  0  0  0  0  0  0  0  0
    1.3781   -3.2875    0.0000 C   0  0  0  0  0  0  0  0  0  0  0  0
    0.6707   -2.8631    0.0000 C   0  0  0  0  0  0  0  0  0  0  0  0
    0.6845   -2.0382    0.0000 C   0  0  0  0  0  0  0  0  0  0  0  0
    1.4058   -1.6378    0.0000 C   0  0  0  0  0  0  0  0  0  0  0  0
    2.1132   -2.0622    0.0000 C   0  0  0  0  0  0  0  0  0  0  0  0
    2.8068   -3.3115    0.0000 C   0  0  0  0  0  0  0  0  0  0  0  0
    3.5281   -2.9111    0.0000 C   0  0  0  0  0  0  0  0  0  0  0  0
    4.2356   -3.3355    0.0000 C   0  0  0  0  0  0  0  0  0  0  0  0
    4.2217   -4.1604    0.0000 C   0  0  0  0  0  0  0  0  0  0  0  0
    3.5004   -4.5608    0.0000 C   0  0  0  0  0  0  0  0  0  0  0  0
    2.7930   -4.1364    0.0000 C   0  0  0  0  0  0  0  0  0  0  0  0
   -0.0506   -3.2636    0.0000 C   0  0  0  0  0  0  0  0  0  0  0  0
    4.9569   -2.9351    0.0000 C   0  0  0  0  0  0  0  0  0  0  0  0
    4.9707   -2.1102    0.0000 O   0  0  0  0  0  0  0  0  0  0  0  0
   -4.9612    2.1821    0.0000 C   0  0  0  0  0  0  0  0  0  0  0  0
   -5.6825    1.7816    0.0000 C   0  0  0  0  0  0  0  0  0  0  0  0
    5.0538    2.8391    0.0000 S   0  0  0  0  0  0  0  0  0  0  0  0
    7.9180    2.8854    0.0000 C   0  0  0  0  0  0  0  0  0  0  0  0
    7.1945    3.2818    0.0000 C   0  0  0  0  0  0  0  0  0  0  0  0
    6.4894    2.8535    0.0000 C   0  0  0  0  0  0  0  0  0  0  0  0
    8.6231    3.3137    0.0000 O   0  0  0  0  0  0  0  0  0  0  0  0
    7.9364    2.0606    0.0000 N   0  0  0  0  0  0  0  0  0  0  0  0
    7.2314    1.6322    0.0000 N   0  0  0  0  0  0  0  0  0  0  0  0
    7.2498    0.8074    0.0000 C   0  0  0  0  0  0  0  0  0  0  0  0
    6.5447    0.3791    0.0000 C   0  0  0  0  0  0  0  0  0  0  0  0
    6.5631   -0.4457    0.0000 C   0  0  0  0  0  0  0  0  0  0  0  0
    5.8580   -0.8741    0.0000 C   0  0  0  0  0  0  0  0  0  0  0  0
    5.1345   -0.4776    0.0000 C   0  0  0  0  0  0  0  0  0  0  0  0
    5.1161    0.3472    0.0000 C   0  0  0  0  0  0  0  0  0  0  0  0
    5.8212    0.7755    0.0000 C   0  0  0  0  0  0  0  0  0  0  0  0
    4.4295   -0.9060    0.0000 O   0  0  0  0  0  0  0  0  0  0  0  0
    5.7659    3.2499    0.0000 S   0  0  0  0  0  0  0  0  0  0  0  0
    3.7059   -0.5095    0.0000 C   0  0  0  0  0  0  0  0  0  0  0  0
  1  2  1  4      
  1  3  2  0      
  1  4  1  0      
  5  6  1  0      
  6  7  2  0      
  7  8  1  0      
  8  9  2  0      
  9 10  1  0      
  5 10  2  0      
 11 12  1  0      
 12 13  2  0      
 13 14  1  0      
 14 15  2  0      
 15 16  1  0      
 11 16  2  0      
 18 19  1  0      
 19 20  1  0      
 17 18  1  0      
 20 66  1  0      
 13 17  1  0      
  8 11  1  0      
  2  5  1  4      
 21 22  1  0      
 23 24  2  0      
 24 25  1  0      
 25 26  2  0      
 26 27  1  0      
 27 28  2  0      
 28 29  1  0      
 29 30  2  0      
 30 31  1  0      
 31 32  2  0      
 23 32  1  0      
 27 32  1  0      
 33 34  1  0      
 34 35  2  0      
 35 36  1  0      
 36 37  2  0      
 37 38  1  0      
 33 38  2  0      
 39 40  1  0      
 40 41  2  0      
 41 42  1  0      
 42 43  2  0      
 43 44  1  0      
 39 44  2  0      
 33 39  1  0      
 35 45  1  0      
 46 47  2  0      
 46 48  1  0      
 41 46  1  0      
 29 36  1  0      
 49 50  1  0      
 50 51  2  0      
 51 52  1  0      
 52 53  2  0      
 53 54  1  0      
 49 54  2  0      
 55 56  1  0      
 56 57  2  0      
 57 58  1  0      
 58 59  2  0      
 59 60  1  0      
 55 60  2  0      
 49 55  1  0      
 51 61  1  0      
 62 63  2  0      
 57 62  1  0      
 25 52  1  0      
 22 31  1  0      
  2 21  2  0      
 64 65  1  0      
  4 64  1  0      
 66 81  1  0      
 67 68  1  0      
 68 69  1  0      
 71 72  1  0      
 67 70  2  0      
 67 71  1  0      
 73 74  1  0      
 74 75  1  0      
 75 76  2  0      
 76 77  1  0      
 77 78  2  0      
 78 79  1  0      
 74 79  2  0      
 77 80  1  0      
 72 73  2  0      
 69 81  1  0      
 80 82  1  0      
M  END
